# Supplementary material
Source: ML conference proceedings conference paper supplement (https://proceedings.neurips.cc/paper_files/paper/2022/hash/092c2d45005ea2db40fc24c470663416-Abstract.html)
Supplement: Supplementary file 1 [file 092c2d45005ea2db40fc24c470663416-Supplemental-Conference.zip]

Archive with 4 entries (3 files):
- supplement/
- supplement/Appendix.pdf
- supplement/Guideline for Subjective Evaluation.pdf
- supplement/README.md
