# Supplementary material
Source: ML conference proceedings conference paper supplement (https://proceedings.neurips.cc/paper_files/paper/2022/hash/092c2d45005ea2db40fc24c470663416-Abstract.html)
Supplement: Supplementary file 1 [file 092c2d45005ea2db40fc24c470663416-Supplemental-Conference.zip › supplement/README.md]

# README

For the source code, please refer to https://github.com/microsoft/muzic.
